# Supplementary material for: From the traditional way of pyrolysis to tunable photoluminescent water soluble carbon nano-onions for cell imaging and selective sensing of glucose
Source: Royal Society of Chemistry journal article supplement (doi:10.1039/c6ra04030f), 2016-01-01
Supplement: c6ra04030f1.pdf [file c6ra04030f1.pdf]

## Supporting Information

### From the traditional way of pyrolysis to tunable photoluminescent water soluble carbon nano-onions for cells imaging and selective sensing of glucose

Kumud Malika Tripathi<sup>‡</sup>,<sup>a</sup>Anshu Bhati<sup>‡</sup>,<sup>b</sup>Anupriya Singh,<sup>b</sup>Nidhi Rani Gupta,<sup>c</sup>Sankalp Verma,<sup>d</sup>Sabyasachi Sarkar,<sup>e\*</sup> and Sumit Kumar Sonkar<sup>b\*</sup>

<sup>a</sup>Department of Chemistry, Indian Institute of Technology Kanpur, Kanpur-208016, India.

<sup>b</sup>Department of Chemistry, Malaviya National Institute of Technology, Jaipur, Jaipur-302017, India.

<sup>c</sup>Department of Chemistry, GSSDGS Khalsa College, Patiala – 147001, India.

<sup>d</sup>Department of Materials Science & Engineering, Indian Institute of Technology Kanpur, Kanpur-208016, India.

<sup>e</sup>Department of Chemistry, Indian Institute of Engineering Science and Technology, Shibpur, Howrah-711103, India.

‡: Both the authors contributed equally

#### Contents:

#### 1. Performance comparison

**Table S1.** Performance comparison between various fluorescence sensors toward glucose molecule.

| Methods                                       | Response Time | detection limits                | Ref.       |
|-----------------------------------------------|---------------|---------------------------------|------------|
| i-motif DNA                                   | 30 min.       | 4 $\mu$ M                       | [1]        |
| APBA-CuInS <sub>2</sub> QDs                   | 40 min.       | 1.2 $\mu$ mol L <sup>-1</sup>   | [2]        |
| Optical fiber                                 | 10 min.       | 0.05 $\mu$ g/ml                 | [3]        |
| CdTe-QDs                                      | 15 min.       | 50 nm                           | [4]        |
| BSA-Au nanoclusters                           | 60 min.       | 5.0 $\times$ 10 <sup>-6</sup> M | [5]        |
| GOx immobilized on Bamboo inner cell membrane | 5 min.        | 58 $\mu$ M                      | [6]        |
| wsCNO                                         | Immediate     | 1.3 X 10 <sup>-2</sup> M        | this study |

#### 2. Calculation of detection limit(LD) of glucose

The detection limit of glucose was calculated with the help of following equation:

$$LD=3SD/K$$

K represents the slope of linear fit curve of the fluorescence turn on values ( $I/I_0$ ) vs. glucose concentration and SD denoted the the standard deviation. As demonstrated in Figure S2, the K value is obtained to be 234,46, whereas SD is 1.05. The LD was thus calculated to be  $1.3 \times 10^{-2}$  M.

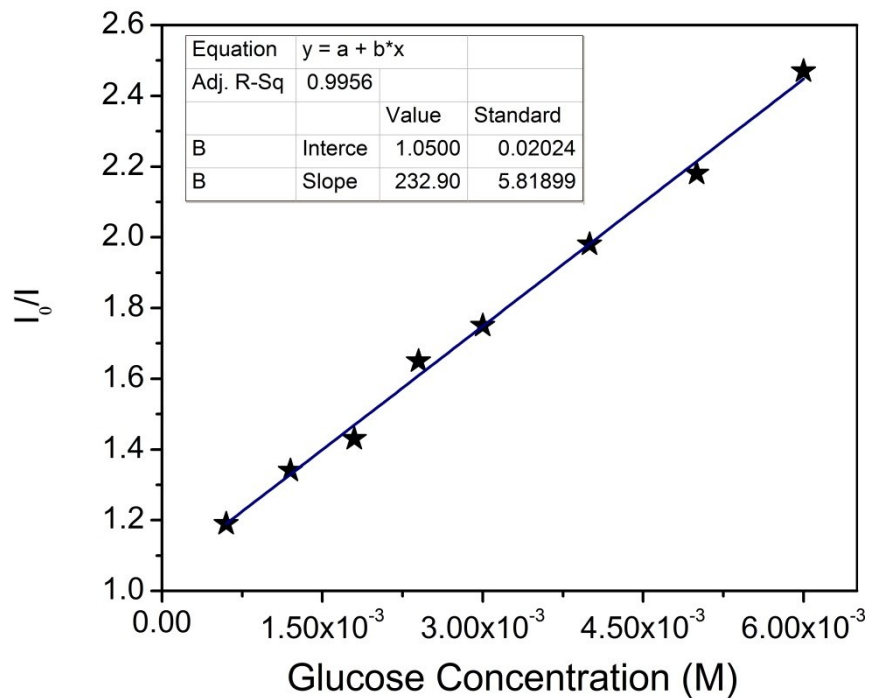

**Figure S2.** Calibration curve for fluorescence turn on by glucose

#### References:

1. Q. Ke, Y. Zheng, F. Yang, H. Zhang and X. Yang, *Talanta*, 2014, **129**, 539–544.
2. Z. Liu, L. Liu, M. Sun and X. Su, *Biosens. Bioelectron...*, 2015, **65**, 145–151.
3. D. L. Meadows and J. S. Schultz. *Anal. Chim. Acta.*, 1993, **280**, 21–30.
4. B. Tang, L. Cao, K. Xu, L. Zhuo, J. Ge, Q. Li and L. Yu. *Chem. Eur. J.* 2008, **14**, 3637–3644.
5. L. Jin, L. Shang, S. Guo, Y. Fang, D. Wen, L. Wang, J. Yin and S. Dong, *Biosens Bioelectron.* 2011, **26**, 1965–1969.
6. X. Yang, Z. Zhou, D. Xiao and M. M. F. Choi, *Biosens Bioelectron.* 2006, **21**, 1613–1620.
